# Supplementary material for: Biofabrication of reinforced 3D-scaffolds using two-component hydrogels
Source: Royal Society of Chemistry journal article supplement (doi:10.1039/c5tb01645b), 2015-01-01
Supplement: c5tb01645b1.pdf [file c5tb01645b1.pdf]

## Supporting information

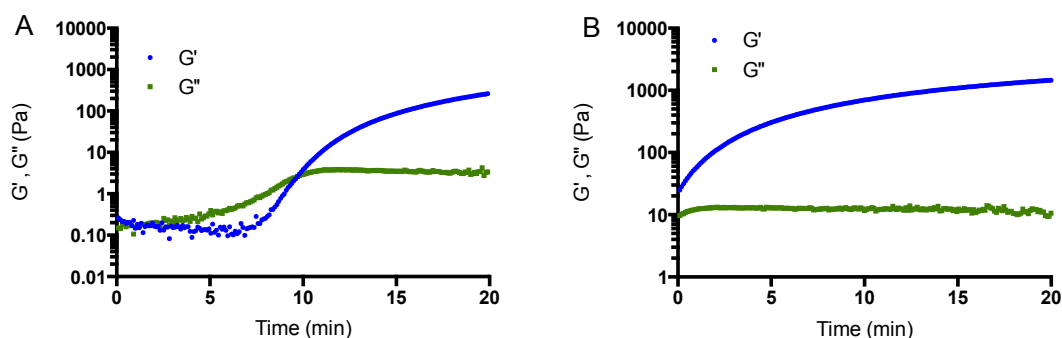

**SI-Figure 1.** Evaluation of storage modulus ( $G'$ ) and loss modulus ( $G''$ ) during the first 20 minutes of pre-cross-linking at 20 °C of A) PNC-PEGNHS (7.5-3.8 wt%) and B) PNC-HANHS (7.5-1.6 wt%).

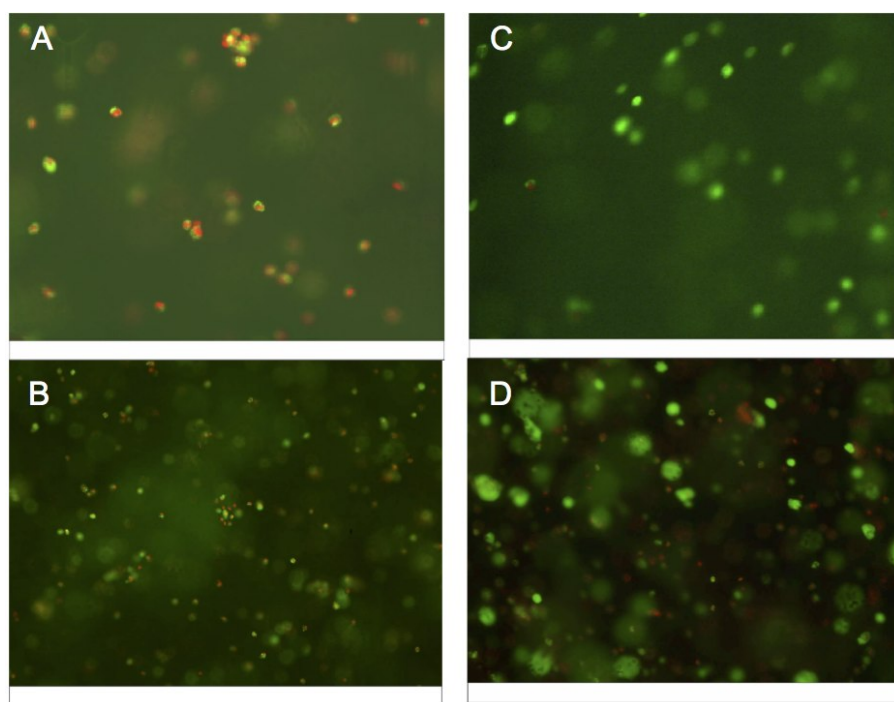

**SI-Figure 2.** Live Dead chondrocyte viability of PNC-PEG (7.5-3.8 wt%) after A) 4 hours and B) 7 days. Chondrocyte viability of PNC-HA (7.5-1.6 wt%) after C) 4 hours and D) 7 days.

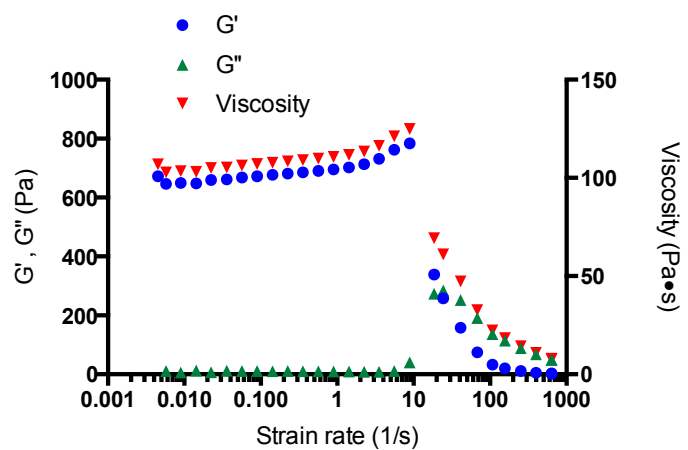

**SI-Figure 3.** Effect of increasing strain rate on storage modulus ( $G'$ ), loss modulus ( $G''$ ) and viscosity of PNC-PEG (7.5-3.8 wt%) as measured by rheology.
